# Supplementary material
Source: PubMed Central journal article supplement (PMC6685190)
Supplement: Supp_Data.pdf [file Supp_Data.pdf]

## Supplementary Data

SUPPLEMENTARY TABLE S1. CHARACTERISTICS OF 19 RANDOMIZED CLINICAL TRIALS OF PALLIATIVE CARE INTERVENTIONS IN CANCER

| Study                                           | Patient population                                                                                                                                                | Domains addressed                                                | Intervention                                                                                                                                                                  | Duration                                                                                                                                                                                                                 | Location                                                                                                                     | Provider specialization                                                                                                                                                             | Outcomes measured                                                                                                |
|-------------------------------------------------|-------------------------------------------------------------------------------------------------------------------------------------------------------------------|------------------------------------------------------------------|-------------------------------------------------------------------------------------------------------------------------------------------------------------------------------|--------------------------------------------------------------------------------------------------------------------------------------------------------------------------------------------------------------------------|------------------------------------------------------------------------------------------------------------------------------|-------------------------------------------------------------------------------------------------------------------------------------------------------------------------------------|------------------------------------------------------------------------------------------------------------------|
| Bakitas et al. <sup>S1</sup><br>(United States) | Patients recently diagnosed with GI, lung, GU, or breast cancer; prognosis approximately one year                                                                 | Structure, physical, psychological, social, and legal            | A manualized, psychoeducational intervention focusing on: symptom management, patient empowerment, self-management, problem solving, communication, and advance care planning | Longitudinal: four weekly educational sessions and monthly follow-up sessions, which reinforced session content and referred patients to appropriate care resources until patient death or study completion (four years) | Telephone-based format                                                                                                       | Specialty PC: advanced practice nurses with PC specialty training                                                                                                                   | Quality of life; physical symptoms; survival; patient mood; resource utilization and expenditures                |
| Bakitas et al. <sup>S2</sup><br>(United States) | Advanced-stage cancer (lung, GI tract, breast, other solid tumor, genitourinary tract) or hereditary malignancy; prognosis: 6–24 months                           | Structure, physical, psychological, social, spiritual, and legal | Early delivery (30–60 days postdiagnosis) of Bakitas et al. <sup>S1</sup> intervention plus three-session life review component and an intervention for caregivers            | Longitudinal: six weekly educational sessions with follow-up calls reinforcing session content and helping navigate new patient challenges until patient death or study completion (three years)                         | Telephone-based format, predominantly by only one inpatient consultation)                                                    | Specialty PC: advanced practice nurses with PC specialty training                                                                                                                   | Quality of life; physical symptoms; survival; patient mood; site of death; resource utilization and expenditures |
| Clark et al. <sup>S3</sup><br>(United States)   | Radiation therapy patients with advanced cancer (brain, gastrointestinal, head and neck, lung, and other), plus their caregivers; prognosis: 0%–50% at five years | Structure, physical, psychological, social, and spiritual        | Psychosocial intervention to address the five domains of quality of life: physical, mental, social, emotional, and spiritual                                                  | Longitudinal: 27 weeks total; six sessions of counseling focused on quality of life, followed by telephone counseling sessions over the next six months                                                                  | Mixed: six sessions delivered in person in a comprehensive cancer center, followed by 10 brief telephone counseling sessions | Primary PC: the multiprofessional team included a physical therapist, a clinical psychologist or psychiatrist, an advanced practice nurse, a hospital chaplain, and a social worker | Quality of life; caregiver outcomes                                                                              |
| Dyar et al. <sup>S4</sup><br>(United States)    | Metastatic cancer patients with a strong expectation of hospice referral within 12 months of enrollment                                                           | Physical, psychological, social, spiritual, EOL, and legal       | Discussion-based intervention focusing on educating patients about hospice advance-care planning, and assessing the five domains of quality of life                           | Acute: one month                                                                                                                                                                                                         | Inpatient                                                                                                                    | Primary PC: oncology advanced registered nurse practitioners                                                                                                                        | Quality of life                                                                                                  |

(continued)

SUPPLEMENTARY TABLE S1. (CONTINUED)

| <i>Study</i>                                   | <i>Patient population</i>                                                                                                                                                                                      | <i>Domains addressed</i>                                              | <i>Intervention</i>                                                                                                                                                                    | <i>Duration</i>                                                                                                           | <i>Location</i>                                                                                              | <i>Provider specialization</i>                                                                                                                                                                         | <i>Outcomes measured</i>                                                       |
|------------------------------------------------|----------------------------------------------------------------------------------------------------------------------------------------------------------------------------------------------------------------|-----------------------------------------------------------------------|----------------------------------------------------------------------------------------------------------------------------------------------------------------------------------------|---------------------------------------------------------------------------------------------------------------------------|--------------------------------------------------------------------------------------------------------------|--------------------------------------------------------------------------------------------------------------------------------------------------------------------------------------------------------|--------------------------------------------------------------------------------|
| Farquhar et al. <sup>55</sup> (United Kingdom) | Advanced cancer patients (lung, breast, rectal, prostate, lymphoma, mesothelioma, gastroesophageal, renal, endometrial, hepatocellular, bladder, and unknown) diagnosed with breathlessness and troubled by it | Structure, physical, psychological, and social                        | The breathlessness support service: a nonpharmacological and pharmacological intervention (e.g., breathing control, individualized exercise plans, and brief cognitive therapy)        | Acute: two weeks                                                                                                          | Home based and telephone based                                                                               | Specialty PC: a PC medical consultant, a clinical specialist physiotherapist, and an administrator                                                                                                     | Physical symptoms; patient mood                                                |
| Given et al. <sup>56</sup> (United States)     | Recently diagnosed cancer patients (breast, colon, lung, gynecologic, lymphoma, or other solid tumors) receiving chemotherapy and reporting both pain and fatigue plus their caregivers                        | Physical and social                                                   | A supportive, cognitive-behavioral pain and fatigue management intervention delivered using a computerized decision support tool; focused on symptom management and social functioning | Longitudinal: 18 weeks                                                                                                    | Mixed: six in-person sessions at outpatient cancer treatment sites and four sessions delivered via telephone | Primary PC: oncology nurses                                                                                                                                                                            | Quality of life; physical symptoms                                             |
| Grudzen et al. <sup>57</sup> (United States)   | Stage III–IV cancer (solid or hematological, breast, colorectal, lung, or other) patients                                                                                                                      | Structure, physical, psychological, social, spiritual, EOL, and legal | A comprehensive PC consultation focusing on symptom assessment and treatment, social needs, goals of care, and transition planning                                                     | Acute: PC consultation on the same day as admission or the following day                                                  | Inpatient: emergency department                                                                              | Specialty PC: PC physician, nurse practitioner, a social worker, and a chaplain                                                                                                                        | Quality of life; survival; patient mood; resource utilization and expenditures |
| Jordhoy et al. <sup>58</sup> (Norway)          | Incurable cancer patients (gastrointestinal, lung, breast, and female genitals, prostate and male genitals, kidney or vesical or ureter, lymphomas, skin, and other); prognosis: two to nine months            | Structure, physical, psychological, and EOL                           | A multiprofessional, comprehensive intervention that combined hospital service with community service by providing PC education and training for community professionals               | Longitudinal: assessments made until patients' deaths (two to nine months) with four months being median patient survival | Mixed: inpatient and outpatient clinics, with home-based services                                            | Specialty PC: consultant PC nurse or physician, as well the patients' general practitioners and community nurses; the community staff had bedside training and 6–12 hours of lectures every six months | Quality of life; patient mood                                                  |

(continued)

SUPPLEMENTARY TABLE S1. (CONTINUED)

| Study                                             | Patient population                                                                                                                                          | Domains addressed                                              | Intervention                                                                                                                                                                                                                                                                                                                 | Duration                                                                                                                                                     | Location                                                                                                                                                                           | Provider specialization                                                                                                                                                                                                                                                                                              | Outcomes measured                                                                                                  |
|---------------------------------------------------|-------------------------------------------------------------------------------------------------------------------------------------------------------------|----------------------------------------------------------------|------------------------------------------------------------------------------------------------------------------------------------------------------------------------------------------------------------------------------------------------------------------------------------------------------------------------------|--------------------------------------------------------------------------------------------------------------------------------------------------------------|------------------------------------------------------------------------------------------------------------------------------------------------------------------------------------|----------------------------------------------------------------------------------------------------------------------------------------------------------------------------------------------------------------------------------------------------------------------------------------------------------------------|--------------------------------------------------------------------------------------------------------------------|
| Kane et al. <sup>S9</sup><br>(United States)      | Terminal cancer patients (lung, prostate, ear, nose, throat, brain, and other); prognosis: two weeks to six months                                          | Structure, physical, psychological, social, spiritual, and EOL | Hospice services, focusing on conducting assessments and developing treatment plans                                                                                                                                                                                                                                          | Longitudinal: patients followed until death; some patients died within 45 days of the start of the study, others dying up to two years after the study began | Mixed: inpatient or at home                                                                                                                                                        | Specialty PC: hospice physicians, nurses, a social worker, a chaplain, and 30 volunteers                                                                                                                                                                                                                             | Physical symptoms; patient mood; resource utilization and expenditures; satisfaction with care; caregiver outcomes |
| McCorkle et al. <sup>S10</sup><br>(United States) | Newly diagnosed patients with progressive, ≥Stage II lung cancer                                                                                            | Structure, physical, psychological, and social                 | Intervention 1: the oncology home care (OHC) program, focusing on symptom and pain management, psychosocial assessment, self-support and communication; Intervention 2: the standard home care (SHC) program, including an interdisciplinary team that would coordinate visits, length of services, and discharges from care | Longitudinal: six months of home care treatment                                                                                                              | Home based                                                                                                                                                                         | Primary PC: Intervention 1: masters-prepared nurses with advanced training in caring for Stage II lung cancer patients; Intervention 2: regular home care nurses, plus an interdisciplinary team of physical therapists, home health aides, medical social workers, occupational therapists, and speech pathologists | Physical symptoms; survival; resource utilization and expenditures                                                 |
| McCorkle et al. <sup>S11</sup><br>(United States) | Recently diagnosed late-stage cancer patients (lung, head or neck, gastrointestinal, gynecological) with ≥1 chronic condition who are postbiopsy or surgery | Structure, physical, psychological, social, and legal          | Multidisciplinary intervention focusing on topics, including symptom management, care coordination, teaching patients and their family caregivers, and clarifying goals of care                                                                                                                                              | Longitudinal: 10 weeks                                                                                                                                       | Outpatient: disease-specific clinics: gynecologic and lung clinics were randomized to the 10-week intervention, and the head and neck and GI patients received enhanced usual care | Primary PC: advance practice nurses working closely with PAs, medical social workers, nurse coordinators, medical oncologists, surgeons, and radiation oncologists                                                                                                                                                   | Quality of life; physical symptoms; survival                                                                       |

(continued)

SUPPLEMENTARY TABLE S1. (CONTINUED)

| <i>Study</i>                                    | <i>Patient population</i>                                                                                                                                                    | <i>Domains addressed</i>            | <i>Intervention</i>                                                                                                                                                                                                                                       | <i>Duration</i>                                | <i>Location</i>                | <i>Provider specialization</i>                             | <i>Outcomes measured</i>                               |
|-------------------------------------------------|------------------------------------------------------------------------------------------------------------------------------------------------------------------------------|-------------------------------------|-----------------------------------------------------------------------------------------------------------------------------------------------------------------------------------------------------------------------------------------------------------|------------------------------------------------|--------------------------------|------------------------------------------------------------|--------------------------------------------------------|
| Northouse et al. <sup>S12</sup> (United States) | Recurrent breast cancer patients plus a family caregiver; prognosis: greater than or equal to six months                                                                     | Physical, psychological, and social | Family-based, manualized intervention focusing on five domains: family involvement, optimistic attitude, coping effectiveness, uncertainty reduction, and symptom management                                                                              | Longitudinal: six months                       | Home based and telephone based | Primary PC: intervention nurses trained in PC for 40 hours | Quality of life; caregiver outcomes                    |
| Northouse et al. <sup>S13</sup> (United States) | Prostate cancer patients (in one to three phases of prostate cancer: newly diagnosed, biochemical recurrence, or advanced) plus their spouses; prognosis more than 12 months | Physical, psychological, and social | Northouse et al. <sup>S12</sup> intervention adapted for prostate cancer patients                                                                                                                                                                         | Longitudinal: four months                      | Home based and telephone based | Primary PC: intervention nurses trained in PC for 40 hours | Quality of life; physical symptoms; caregiver outcomes |
| Northouse et al. <sup>S14</sup> (United States) | Stage III or IV cancer patients (breast, colorectal, lung, and prostate) plus their caregivers; prognosis: greater than or equal to six months                               | Physical, psychological, and social | The Northouse et al. <sup>S12</sup> intervention reworked into Brief and Extensive versions; Brief: three contacts: two 90-min home visits, and one 30-min phone session; Extensive: six contacts: four 90-min home visits, and two 30-min phone sessions | Longitudinal: both programs were 10 weeks long | Home based and telephone based | Primary PC: intervention nurses trained in PC for 40 hours | Quality of life; caregiver outcomes                    |

(continued)

SUPPLEMENTARY TABLE S1. (CONTINUED)

| Study                                            | Patient population                                                                                                                                                                                                                                               | Domains addressed                                             | Intervention                                                                                                                                                             | Duration                                                                                                                                                                                                                                 | Location                                                                                                                                                 | Provider specialization                                                                                         | Outcomes measured                                                                                                        |
|--------------------------------------------------|------------------------------------------------------------------------------------------------------------------------------------------------------------------------------------------------------------------------------------------------------------------|---------------------------------------------------------------|--------------------------------------------------------------------------------------------------------------------------------------------------------------------------|------------------------------------------------------------------------------------------------------------------------------------------------------------------------------------------------------------------------------------------|----------------------------------------------------------------------------------------------------------------------------------------------------------|-----------------------------------------------------------------------------------------------------------------|--------------------------------------------------------------------------------------------------------------------------|
| Rummans et al. <sup>S15</sup><br>(United States) | Advanced cancer patients undergoing radiation therapy (brain, head and neck, lung, ovarian, GI, or other); Prognosis: estimated 5-year survival of 0%–50%                                                                                                        | Structure, physical, psychological, social, and spiritual     | Structured intervention to address the five domains of quality of life: physical, mental, social, emotional, and spiritual                                               | Acute: four weeks                                                                                                                                                                                                                        | Outpatient: a comprehensive cancer center                                                                                                                | Primary PC: psychiatrists, psychologists, advanced practice nurses, hospital chaplains, and social workers      | Quality of life; physical symptoms; patient mood                                                                         |
| Steel et al. <sup>S16</sup><br>(United States)   | Patients with hepatocellular carcinoma, cholangiocarcinoma, gallbladder carcinoma, neuroendocrine carcinoma, pancreatic carcinoma, or other primary cancers with metastasis to the liver (ovarian, breast, and colorectal cancers), plus their family caregivers | Physical and psychological                                    | Web-based collaborative care, psychoeducational intervention, including cognitive-behavioral therapy, self-management strategies, and symptom management recommendations | Longitudinal: total length of study unclear, but there were visits with care coordinators during physician's appointments every two months and telephone calls with the care coordinator every two weeks; assessments made at six months | Mixed: Website at home, telephone contact or face-to-face contact with the collaborative care coordinator in an oncology outpatient clinic or a hospital | Primary PC: Collaborative care coordinator with training in cognitive-behavioral therapy                        | Quality of life; physical symptoms; patient mood; caregiver outcomes                                                     |
| Temel et al. <sup>S17</sup><br>(United States)   | Newly diagnosed (within 11 weeks) metastatic non-small cell lung cancer patients                                                                                                                                                                                 | Structure, physical, psychological, spiritual, EOL, and legal | Intervention consisted of specialist PC integrated with standard oncologic care                                                                                          | Longitudinal: monthly until patient death; median survival among patients was 10 months                                                                                                                                                  | Outpatient: a thoracic oncology clinic                                                                                                                   | Specialty PC: a PC team consisting of a board-certified PC physician, advanced-practice nurses, and oncologists | Quality of life; physical symptoms; survival; patient mood; advance care planning; resource utilization and expenditures |

(continued)

SUPPLEMENTARY TABLE S1. (CONTINUED)

| <i>Study</i>                                       | <i>Patient population</i>                                                                                                           | <i>Domains addressed</i>                                              | <i>Intervention</i>                                                                                                                  | <i>Duration</i>           | <i>Location</i>                                                                      | <i>Provider specialization</i>                                                                                                                      | <i>Outcomes measured</i>           |
|----------------------------------------------------|-------------------------------------------------------------------------------------------------------------------------------------|-----------------------------------------------------------------------|--------------------------------------------------------------------------------------------------------------------------------------|---------------------------|--------------------------------------------------------------------------------------|-----------------------------------------------------------------------------------------------------------------------------------------------------|------------------------------------|
| Wallen <sup>S18</sup><br>et al.<br>(United States) | Advanced cancer patients (types not specified)                                                                                      | Structure, physical, psychological, social, and spiritual             | Intervention included consult services with assessments of pain, symptoms, and emotional and spiritual distress                      | Longitudinal: 12 months   | Mixed: both inpatient and outpatient clinics                                         | Specialty PC: two attending physicians, three nurse practitioners, a nurse thanatologist, and a physician fellow in hospice and palliative medicine | Physical symptoms; survival        |
| Zimmermann <sup>S19</sup><br>(Canada)              | Advanced stage III or IV cancer patients (lung, gastrointestinal, genitourinary, breast, and gynecological); prognosis: 6–24 months | Structure, physical, psychological, social, spiritual, EOL, and legal | Intervention focusing on an assessment of symptoms, goals of care, advance care planning, psychological distress, and social support | Longitudinal: four months | Mixed: inpatient and outpatient PC, with home services and routine telephone contact | Specialty PC: PC physician and nurse                                                                                                                | Quality of life; physical symptoms |

PC, palliative care; GI, gastrointestinal; GU, genitourinary; EOL, end of life.

SUPPLEMENTARY TABLE S2. CHARACTERISTICS OF SIX RANDOMIZED CLINICAL TRIALS OF PALLIATIVE CARE INTERVENTIONS IN HEART FAILURE

| <i>Study</i>                                                | <i>Patient population</i>                                                                                                                                                             | <i>Domains addressed</i>                                         | <i>Intervention</i>                                                                                                                                                                                                                                                              | <i>Duration</i>                                                                                                                                                                                        | <i>Location</i>                                                                                                                                      | <i>Provider specialization</i>                                                                                           | <i>Outcomes measured</i>                                                            |
|-------------------------------------------------------------|---------------------------------------------------------------------------------------------------------------------------------------------------------------------------------------|------------------------------------------------------------------|----------------------------------------------------------------------------------------------------------------------------------------------------------------------------------------------------------------------------------------------------------------------------------|--------------------------------------------------------------------------------------------------------------------------------------------------------------------------------------------------------|------------------------------------------------------------------------------------------------------------------------------------------------------|--------------------------------------------------------------------------------------------------------------------------|-------------------------------------------------------------------------------------|
| Aiken et al. <sup>S20</sup><br>(United States)              | Class IIIB–IV chronic heart failure patients (68%) or chronic obstructive pulmonary disease patients (32%); prognosis: less than two years                                            | Structure, physical, psychological, social, spiritual, and legal | Intensive, home-based care managed by nurse case managers, along with patients' existing source of medical care, focusing on disease and symptom management, educational services, and support services                                                                          | Longitudinal: total duration of intervention unclear, but patients averaged 44 contacts during the intervention, with three to six visits/calls per month during the first six months of participation | Home based and telephone based                                                                                                                       | Primary PC: registered nurse case managers with extensive specialized training in the intensive PC protocol              | Physical symptoms; advance care planning; resource utilization and expenditures     |
| Bekelman et al. <sup>S21</sup><br>(United States)           | Chronic heart failure patients with heavy symptom burden, and impaired quality of life and functional status (as measured by a Kansas City Cardiomyopathy Questionnaire score of <60) | Structure, physical, and psychological                           | Multiprofessional chronic heart failure management, screening and treatment for depression, and tele-monitoring with patient self-care support                                                                                                                                   | Longitudinal: one year study period                                                                                                                                                                    | Mixed: home based and telephone based, including some in-person meetings at a VA medical center, or at affiliated community-based outpatient clinics | Primary PC: a nurse coordinator, a cardiologist, a psychiatrist, and a primary care physician                            | Quality of life; survival; patient mood; resource utilization and expenditures      |
| Brannstrom et al. <sup>S22</sup><br>(Sweden) <sup>S22</sup> | Patients with chronic heart failure (NYHA class III–IV) and a prognosis of less than one year                                                                                         | Structure, physical, psychological, social, and spiritual        | Multidisciplinary, collaborative care intervention that integrates heart failure disease management and PC services focusing on continually assessing physiological, social, and spiritual needs and fostering a partnership between patients/carers and professional caregivers | Longitudinal: six months and then patients were transferred to the original care provider with their individual care plans established; meetings took place among the team members twice a month       | Home based and telephone based                                                                                                                       | Specialty PC: specialized nurses, PC nurses, cardiologists, PC physicians, physiotherapists, and occupational therapists | Quality of life; physical symptoms; survival; resource utilization and expenditures |

(continued)

SUPPLEMENTARY TABLE S2. (CONTINUED)

| <i>Study</i>                                        | <i>Patient population</i>                                                                                                                         | <i>Domains addressed</i>                                         | <i>Intervention</i>                                                                                                                                                                                 | <i>Duration</i>                                                                                                                         | <i>Location</i>                | <i>Provider specialization</i>                                                                                                                                                                                      | <i>Outcomes measured</i>                                                                                                 |
|-----------------------------------------------------|---------------------------------------------------------------------------------------------------------------------------------------------------|------------------------------------------------------------------|-----------------------------------------------------------------------------------------------------------------------------------------------------------------------------------------------------|-----------------------------------------------------------------------------------------------------------------------------------------|--------------------------------|---------------------------------------------------------------------------------------------------------------------------------------------------------------------------------------------------------------------|--------------------------------------------------------------------------------------------------------------------------|
| Hopp et al. <sup>S23</sup><br>(United States)       | Advanced chronic heart failure patients (NYHA class III–IV) hospitalized for acute decompensation; prognosis: one-year mortality risk $\geq 33\%$ | Structure, physical, psychological, social, spiritual, and legal | PC consultation                                                                                                                                                                                     | Acute: at least one PC consultation                                                                                                     | Inpatient                      | Specialty PC: Palliative care consultation team, including a physician and a nurse practitioner; chaplain and social worker also available                                                                          | Survival; advance care planning; resource utilization and expenditures                                                   |
| Sidebottom et al. <sup>S24</sup><br>(United States) | Adult inpatients with acute heart failure                                                                                                         | Structure, physical, psychological, social, spiritual, and legal | Assessments of patients' symptom burden, depression, and quality of life, focusing on emotional, spiritual, and psychosocial aspects of their care and offering referrals for advance care planning | Acute: study paid for only the initial PC consultation, with any subsequent visits billed to the patients' insurance as "standard care" | Inpatient                      | Specialty PC: inpatient team of four physicians, board certified in hospice and palliative medicine, two clinical nurse specialists board certified in advance practice PC nursing, a social worker, and a chaplain | Quality of life; physical symptoms; survival; patient mood; advance care planning; resource utilization and expenditures |
| Wong et al. <sup>S25</sup><br>(Hong Kong)           | Advanced heart failure patients (e.g., NYHA stage III or IV) in their last years of life                                                          | Structure, physical, psychological, social, and legal            | Transitional PC                                                                                                                                                                                     | Longitudinal: 12 weeks                                                                                                                  | Home based and telephone based | Specialty PC: advanced care nurse practitioners and nurse case managers, with support from PC physicians                                                                                                            | Quality of life; physical symptoms; resource utilization and expenditures; satisfaction with care                        |



## Supplementary References

- S1. Bakitas M, Lyons KD, Hegel MT, et al.: Effects of a palliative care intervention on clinical outcomes in patients with advanced cancer. *JAMA* 2009;302:741–749.
- S2. Bakitas MA, Tosteson TD, Li Z, et al.: Early versus delayed initiation of concurrent palliative oncology care: Patient outcomes in the ENABLE III randomized controlled trial. *J Clin Oncol* 2015;33:1438–1445.
- S3. Clark MM, Rummans TA, Atherton PJ, et al.: Randomized controlled trial of maintaining quality of life during radiotherapy for advanced cancer. *Cancer* 2013;119:880–887.
- S4. Dyar S, Lesperance M, Shannon R, et al.: A nurse practitioner directed intervention improves the quality of life of patients with metastatic cancer: Results of a randomized pilot study. *J Palliat Med* 2012;15:890–895.
- S5. Farquhar MC, Prevost AT, McCrone P, et al.: Is a specialist breathlessness service more effective and cost-effective for patients with advanced cancer and their carers than standard care? Findings of a mixed-method randomised controlled trial. *BMC Med* 2014;12:1–13.
- S6. Given B, Given CW, McCorkle R, et al.: Pain and fatigue management: Results of a nursing randomized clinical trial. *Oncol Nurs Forum* 2002;29:949–956.
- S7. Grudzen CR, Richardson LD, Johnson PN, et al.: Emergency department-initiated palliative care in advanced cancer: A randomized clinical trial. *JAMA Oncol* 2016;2:591–598.
- S8. Jordhoy MS, Fayers P, Loge JH, et al.: Quality of life in palliative cancer care: Results from a cluster randomized trial. *J Clin Oncol* 2001;19:3884–3894.
- S9. Kane RL, Wales J, Bernstein L, Leibowitz A: A randomised controlled trial of hospice care. *Lancet* 1984;1:890–894.
- S10. McCorkle R, Benoliel JQ, Donaldson G, et al.: A randomized clinical trial of home nursing care for lung cancer patients. *Cancer* 1989;64:1375–1382.
- S11. McCorkle R, Jeon S, Ercolano E, et al.: An advanced practice nurse coordinated multidisciplinary intervention for patients with late-stage cancer: A cluster randomized trial. *J Palliat Med* 2015;18:962–969.
- S12. Northouse L, Kershaw T, Mood D, Schafenacker A: Effects of a family intervention on the quality of life of women with recurrent breast cancer and their family caregivers. *Psychooncology* 2005;14:478–491.
- S13. Northouse LL, Mood DW, Schafenacker A, et al.: Randomized clinical trial of a family intervention for prostate cancer patients and their spouses. *Cancer* 2007;110:2809–2818.
- S14. Northouse LL, Mood DW, Schafenacker A, et al.: Randomized clinical trial of a brief and extensive dyadic intervention for advanced cancer patients and their family caregivers. *Psychooncology* 2013;22:555–563.
- S15. Rummans TA, Clark MM, Sloan JA, et al.: Impacting quality of life for patients with advanced cancer with a structured multidisciplinary intervention: A randomized controlled trial. *J Clin Oncol* 2006;24:635–642.
- S16. Steel JL, Geller DA, Kim KH, et al.: Web-based collaborative care intervention to manage cancer-related symptoms in the palliative care setting. *Cancer* 2016;122:1270–1282.
- S17. Temel JS, Greer JA, Muzikansky A, et al.: Early palliative care for patients with metastatic non-small-cell lung cancer. *N Engl J Med* 2010;733–742.
- S18. Wallen GR, Baker K, Stolar M, et al.: Palliative care outcomes in surgical oncology patients with advanced malignancies: A mixed methods approach. *Qual Life Res* 2012;21:405–415.
- S19. Zimmermann C, Swami N, Krzyzanowska M, et al.: Early palliative care for patients with advanced cancer: A cluster-randomised controlled trial. *Lancet* 2014;383:1721–1730.
- S20. Aiken LS, Butner J, Lockhart CA, et al.: Outcome evaluation of a randomized trial of the PhoenixCare intervention: Program of case management and coordinated care for the seriously chronically ill. *J Palliat Med* 2006;9:111–126.
- S21. Bekelman DB, Plomondon ME, Carey EP, et al.: Primary results of the Patient-Centered Disease Management (PCDM) for heart failure study: A randomized clinical trial. *JAMA Intern Med* 2015;175:725–732.
- S22. Brannstrom M, Boman K. Effects of person-centred and integrated chronic heart failure and palliative home care. *PREFER: A randomized controlled study. Eur J Heart Fail* 2014;16:1142–1151.
- S23. Hopp FP, Zalenski RJ, Waselewsky D, et al.: Results of a hospital-based palliative care intervention for patients with an acute exacerbation of chronic heart failure. *J Card Fail* 2016;22:1033–1036.
- S24. Sidebottom AC, Jorgenson A, Richards H, et al.: Inpatient palliative care for patients with acute heart failure: Outcomes from a randomized trial. *J Palliat Med* 2015;18:134–142.
- S25. Wong FK, Ng AY, Lee PH, et al.: Effects of a transitional palliative care model on patients with end-stage heart failure: A randomised controlled trial. *Heart* 2016;102:1100–1108.
